# Supplementary material for: Skin-specific mechanisms of body fluid regulation in hypertension
Source: PubMed Central journal article supplement (PMC10621731; doi:10.1042/cs20220609), 2023-02-07
Supplement: CS-2022-0609_supp.pdf [file CS-2022-0609_supp.pdf]

# **Skin-specific mechanisms of body fluid regulation in hypertension**

## **SUPPLEMENTAL MATERIAL**

Jun Yu Chen<sup>1</sup>, Khai Syuen Chew<sup>1</sup>, Sheon Mary<sup>1</sup>, Philipp Boder<sup>1</sup>, Domenico Bagordo<sup>2</sup>, Gian Paolo Rossi<sup>2</sup>, Rhian Margaret Touyz<sup>3</sup>, Christian Delles<sup>1</sup>, Giacomo Rossitto<sup>1,2</sup>

<sup>1</sup> School of Cardiovascular & Metabolic Health, University of Glasgow, UK

<sup>2</sup> Emergency Medicine and Hypertension, DIMED; Università degli Studi di Padova, Italy

<sup>3</sup> Department of Family Medicine, McGill University, Montreal, Canada.

Corresponding author:

**Dr Giacomo Rossitto,**

Emergency Medicine and Hypertension, DIMED, Università degli Studi di Padova,

Via Giustiniani 2, 35128 Padova, Italy

and

School of Cardiovascular & Metabolic Health, University of Glasgow

126 University Place, G12 8TA Glasgow, UK

e-mail: [giacomo.rossitto@unipd.it](mailto:giacomo.rossitto@unipd.it)

Suppl. Figure 1

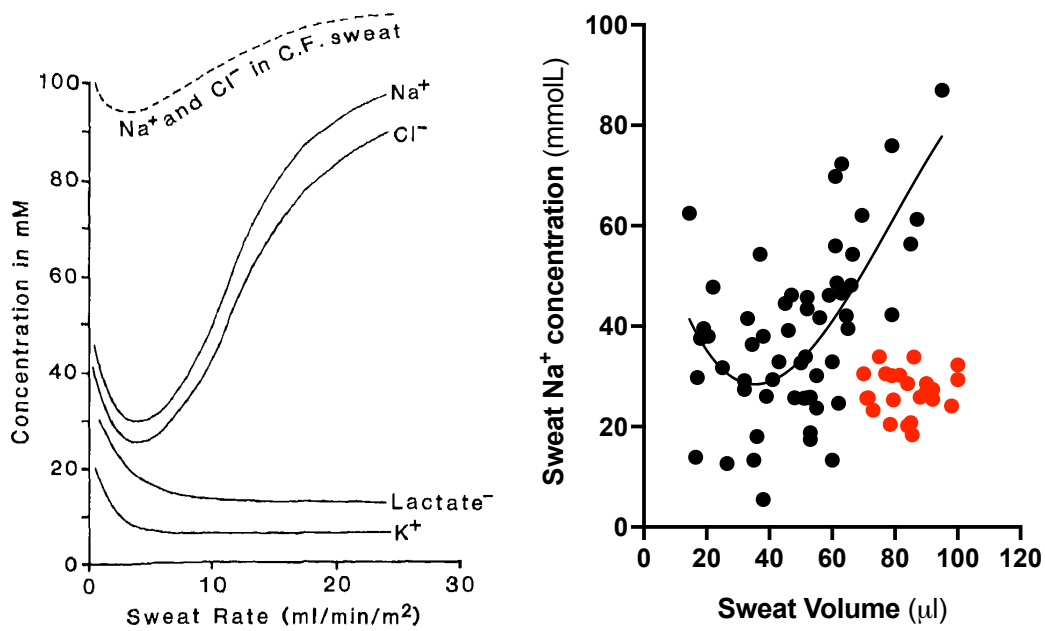

Relationship between sweat Na<sup>+</sup> concentration and sweat volume in physiology (left; from *Sato K, J Am Academy Dermatology 1989, with permissions*) and in our hypertensive cohort (right). With the exception of a group showing high sweat volumes but low tonicity (red dots), a third order polynomial consistent with the physiological distribution also fit ( $p < 0.0005$ ) our study participants.

Suppl. Figure 2

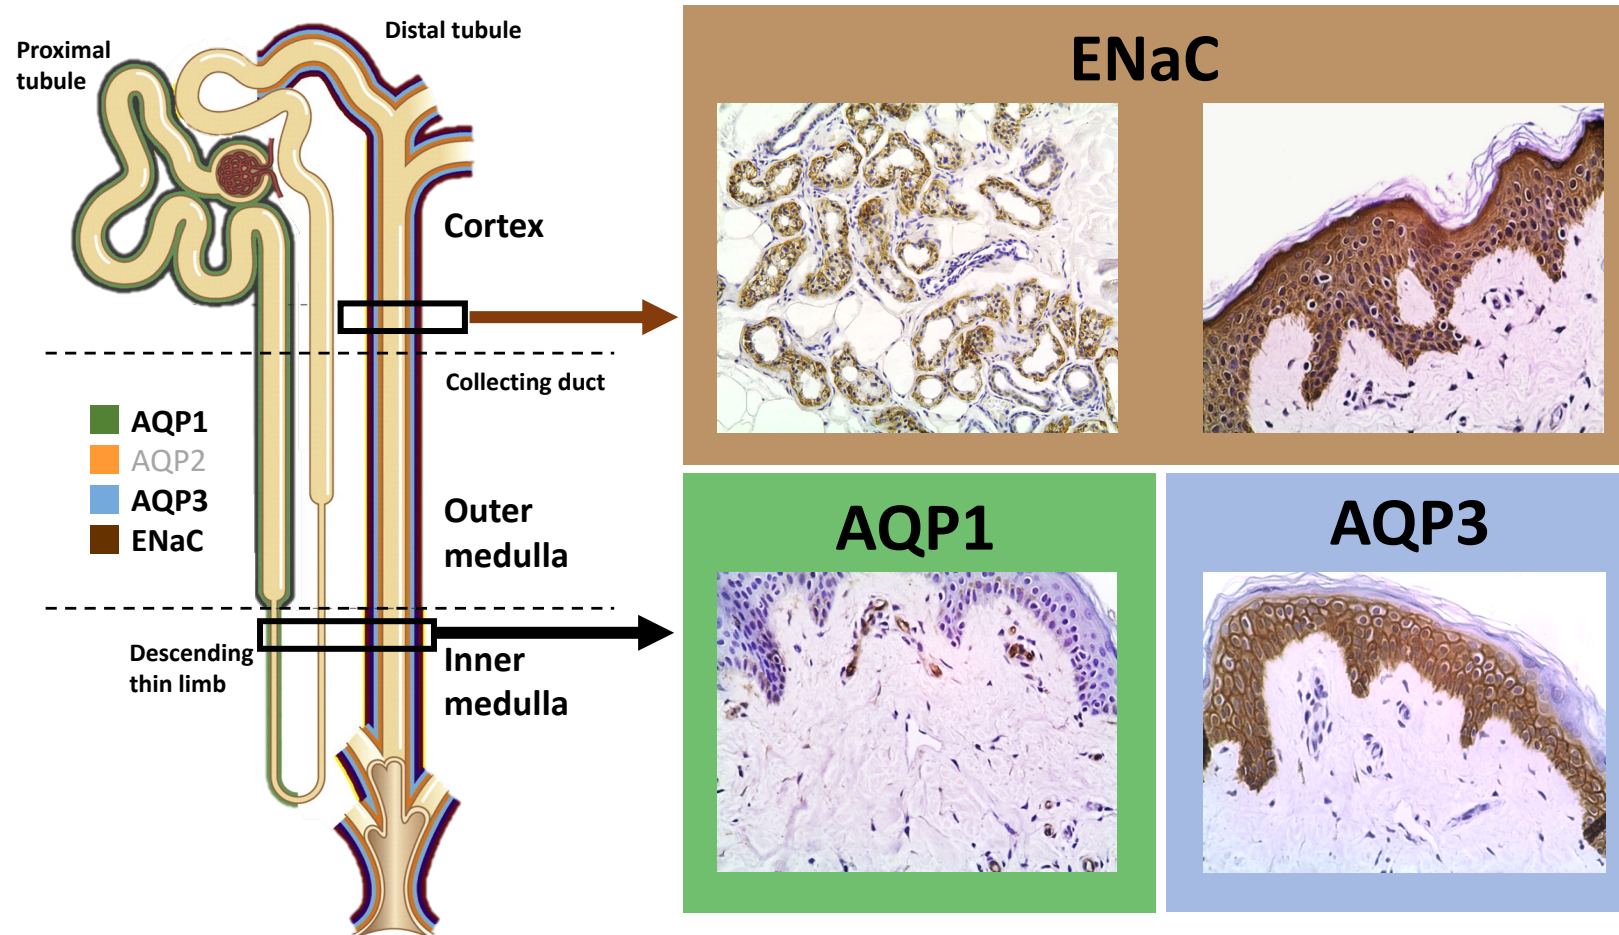

Representative immunohistochemical pictures from our lab from young healthy subjects, showing eccrine sweat gland and epidermal/microvascular staining for channels relevant to Na<sup>+</sup> and water handling, traditionally investigated in the kidney (left panel adapted from Kortenoeven MLA and Fenton RA, *Biochim Biophys Acta*. 2014, with permissions)

**Suppl. Table 1. Correlations between sweat volume and composition with relevant covariates**

| Variables                                    | Sweat Na <sup>+</sup><br>(mmol/l) |              | Sweat K <sup>+</sup><br>(mmol/l) |              | Sweat volume<br>( $\mu$ l) |              | TEWL   |              |
|----------------------------------------------|-----------------------------------|--------------|----------------------------------|--------------|----------------------------|--------------|--------|--------------|
|                                              | $\rho$                            | Sig          | $\rho$                           | Sig          | $\rho$                     | Sig          | $\rho$ | Sig          |
| Sex (1M, 2F)                                 | 0.059                             | 0.606        | -0.016                           | 0.888        | -0.087                     | 0.442        | -0.163 | 0.132        |
| Age (years)                                  | 0.341                             | <b>0.002</b> | -0.184                           | 0.104        | -0.167                     | 0.139        | -0.161 | 0.137        |
| <b>BMI</b> (kg/m <sup>2</sup> )              | -0.086                            | 0.456        | -0.163                           | 0.155        | 0.163                      | 0.152        | 0.056  | 0.611        |
| <b>Office SBP</b> (mmHg)                     | 0.080                             | 0.492        | -0.167                           | 0.146        | -0.093                     | 0.416        | -0.156 | 0.154        |
| <b>Office DBP</b> (mmHg)                     | -0.286                            | <b>0.012</b> | 0.008                            | 0.945        | -0.028                     | 0.809        | -0.087 | 0.427        |
| <b>Pulse pressure</b> (mmHg)                 | 0.229                             | <b>0.045</b> | -0.254                           | <b>0.026</b> | -0.092                     | 0.421        | -0.153 | 0.163        |
| <b>Na<sup>+</sup> intake</b> (questionnaire) | -0.033                            | 0.776        | -0.192                           | 0.099        | 0.021                      | 0.860        | -0.132 | 0.284        |
| <b>Epidermal Na<sup>+</sup></b> (mmol/l)     | 0.302                             | <b>0.019</b> | -0.055                           | 0.677        | -0.158                     | 0.225        | -0.132 | 0.284        |
| <b>s-Na<sup>+</sup></b> (mmol/l)             | 0.091                             | 0.442        | -0.139                           | 0.237        | -0.095                     | 0.420        | -0.014 | 0.897        |
| <b>s-K<sup>+</sup></b> (mmol/l)              | -0.028                            | 0.812        | -0.186                           | 0.110        | 0.117                      | 0.312        | 0.035  | 0.758        |
| <b>s-Urea</b> (mmol/l)                       | 0.085                             | 0.470        | -0.049                           | 0.680        | -0.018                     | 0.876        | -0.091 | 0.414        |
| <b>s-Creatinine</b> (umol/l)                 | -0.091                            | 0.438        | 0.014                            | 0.907        | -0.020                     | 0.865        | -0.002 | 0.982        |
| <b>NT-pro-BNP</b> (pg/ml)                    | 0.087                             | 0.461        | -0.072                           | 0.541        | -0.085                     | 0.467        | 0.060  | 0.589        |
| <b>s-VEGFc</b> (pg/ml)                       | -0.076                            | 0.557        | -0.086                           | 0.508        | 0.292                      | <b>0.020</b> | 0.261  | <b>0.029</b> |

Sweat Na<sup>+</sup> = sweat sodium. Sweat K<sup>+</sup> = sweat potassium. TEWL = transepidermal water loss. BMI = Body Mass Index. SBP = systolic blood pressure. DBP = diastolic blood pressure. Pulse pressure = systolic blood pressure – diastolic blood pressure. Na<sup>+</sup> intake sodium intake score from food questionnaire. Sweat Na<sup>+</sup> = sweat sodium. Sweat K<sup>+</sup> = sweat potassium. Epidermal Na<sup>+</sup> = epidermal sodium. s- = serum. u-ACR = urinary albumin to creatinine ratio (random urine sample). NT-pro-BNP = N-terminal-pro B-type natriuretic peptide. s-VEGFc = serum vascular endothelial growth factor.

**Suppl. Table 2. Characteristics of patients with controlled and uncontrolled blood pressure.**

| <b>Variables</b>                                  | <b>CONTROLLED<br/>(26.1%)</b> | <b>p</b>     | <b>UNCONTROLLED<br/>(73.9%)</b> |
|---------------------------------------------------|-------------------------------|--------------|---------------------------------|
| <b>Females</b>                                    | 16                            |              | 26                              |
| <b>Age (years)</b>                                | 49 ± 16                       | 0.392        | 59 ± 15                         |
| <b>BMI (kg/m<sup>2</sup>)</b>                     | 29.8 (25.8-35.1)              | 0.580        | 29.7 (27.4-35.2)                |
| <b>BMI class</b>                                  |                               |              |                                 |
| <b>Normal weight</b>                              | 3 (13%)                       |              | 7 (10.8%)                       |
| <b>Overweight</b>                                 | 9 (39.1%)                     | 0.951        | 27 (41.5%)                      |
| <b>Obese</b>                                      | 11 (47.8%)                    |              | 31 (47.7%)                      |
| <b>Office SBP (mmHg)</b>                          | <b>128 ± 10</b>               | <b>0.060</b> | <b>155 ± 18</b>                 |
| <b>Office DBP (mmHg)</b>                          | <b>82 ± 6</b>                 | <b>0.053</b> | <b>91 ± 12</b>                  |
| <b>Office HR (beats per minute)</b>               | 71 (65-87)                    | 0.816        | 77 (65-87)                      |
| <b>Number of anti-HTN medications</b>             | 1 (0-2)                       | 0.125        | 2 (1-2)                         |
| <b>0</b>                                          | 8 (34.8%)                     |              | 14 (21.5%)                      |
| <b>1</b>                                          | 6 (26.1%)                     |              | 16 (24.6%)                      |
| <b>2</b>                                          | 8 (34.8%)                     | 0.276        | 19 (29.2%)                      |
| <b>3</b>                                          | 1 (4.3%)                      |              | 11 (16.9%)                      |
| <b>≥ 4</b>                                        | 0 (0%)                        |              | 5 (7.7%)                        |
| <b>ACEi/ARB</b>                                   | 15 (65.2%)                    | 0.207        | 51 (78.5%)                      |
| <b>CCB</b>                                        | 10 (43.5%)                    | 0.170        | 39 (60%)                        |
| <b>Diuretic</b>                                   | 8 (34.8%)                     | 0.412        | 29 (44.6%)                      |
| <b>BB</b>                                         | 4 (17.4%)                     | 0.397        | 17 (26.2%)                      |
| <b>MRA</b>                                        | 1 (4.3%)                      | 0.169        | 10 (15.4%)                      |
| <b>AB</b>                                         | 2 (8.7%)                      | 0.271        | 12 (18.5%)                      |
| <b>Obesity</b>                                    | 12 (52.2%)                    | 0.908        | 33 (50.8%)                      |
| <b>Diabetes mellitus</b>                          | 2 (9.1%)                      | 0.562        | 9 (13.8%)                       |
| <b>Dyslipidaemia</b>                              | 7 (31.8%)                     | <b>0.015</b> | 39 (61.9%)                      |
| <b>eGFR&lt;60 (mL/min/1.73 m<sup>2</sup>)</b>     | 1 (4.3%)                      | 0.217        | 9 (13.8%)                       |
| <b>Na<sup>+</sup> intake (g/d; questionnaire)</b> | 2.62 (1.99-3.28)              | 0.588        | 2.87 (2.08-3.73)                |
| <b>s-Na<sup>+</sup> (mmol/l)</b>                  | 140 (139-141)                 | 0.469        | 140 (139-142)                   |
| <b>s-Urea (mmol/l)</b>                            | 5.0 (4.0-5.9)                 | 0.297        | 5.2 (4.6-6.7)                   |
| <b>s-Creatinine (umol/l)</b>                      | 69 (60-76)                    | 0.098        | 76 (66-87)                      |
| <b>NT-pro-BNP (pg/ml)</b>                         | 52.3 (29.7-118.7)             | 0.071        | 80.2 (44.7-224.7)               |
| <b>s-VEGFc (ng/ml)</b>                            | 14.6 ± 2.5                    | <b>0.019</b> | 12.7 ± 3.4                      |

Qualitative data presented as n (%). Quantitative data presented as mean ± SD or median (interquartile range), as appropriate. BMI = Body Mass Index. BMI class: 1 = underweight (<18.5), normal weight (18.5 - 24.9), 2 = overweight (25.0–29.9), 3 = obesity (>= 30). SBP = systolic blood pressure. DBP = diastolic blood pressure. HR = heart rate. HTN = hypertension. Uncontrolled HTN = SBP ≥ 140 and/or DBP ≥ 90 mmHg. ACEi/ARB = ACE inhibitors or Angiotensin receptor blockers. CCB = calcium channel blockers. BB = beta blockers. MRA = mineralocorticoid antagonists. AB = alpha blockers.
